# Supplementary material for: Honokiol, an activator of Sirtuin-3 (SIRT3) preserves mitochondria and protects the heart from doxorubicin-induced cardiomyopathy in mice
Source: PubMed Central journal article supplement (PMC5470953; doi:10.18632/oncotarget.16133), 2017-03-11
Supplement: oncotarget-08-34082-s001.pdf [file oncotarget-08-34082-s001.pdf]

# Honokiol, an activator of Sirtuin-3 (SIRT3) preserves mitochondria and protects the heart from doxorubicin-induced cardiomyopathy in mice

## Supplementary Material

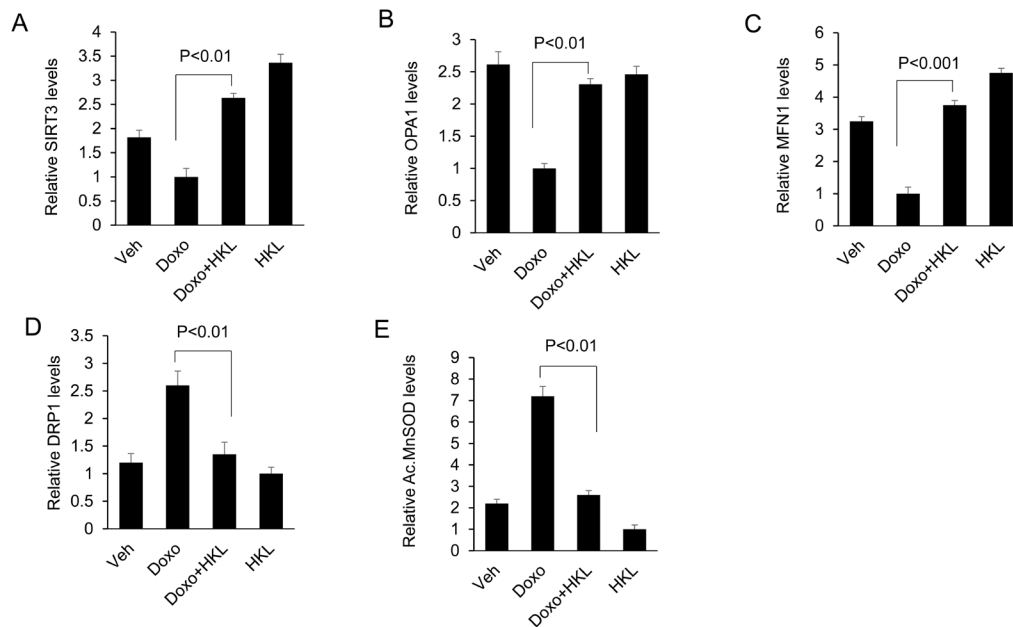

Quantification of relative SIRT3, OPA1, MFN1, DRP1 and acetylated (Ac) MnSOD levels in cardiomyocytes treated as indicated. Values are average of three independent experiments, mean±S.E.

Supplementary Figure 1

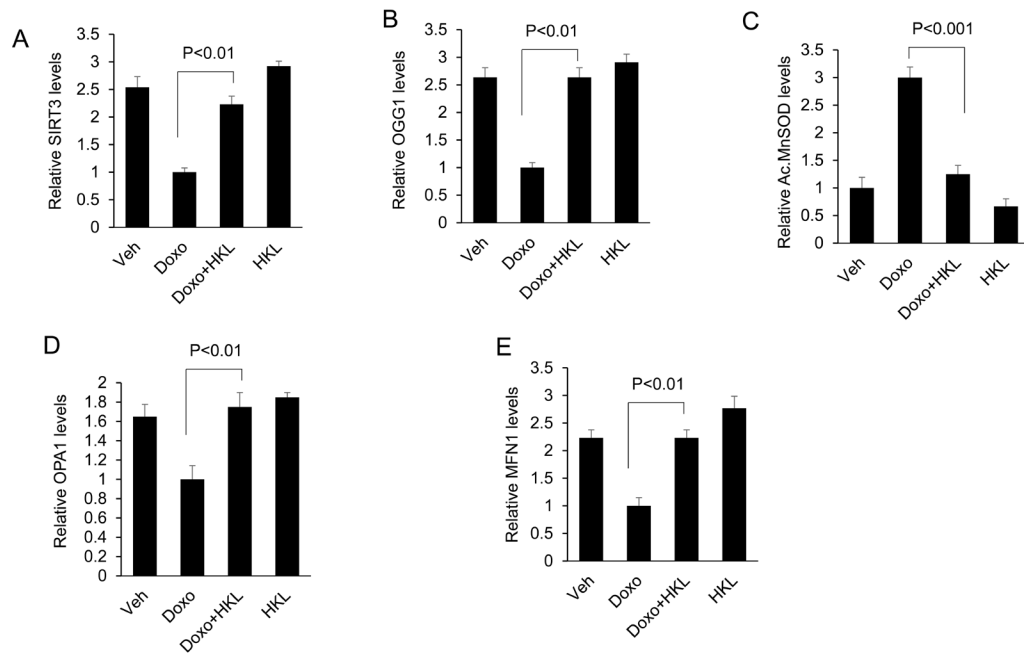

Quantification of relative SIRT3, OGG1, acetylated (Ac) MnSOD, OPA-1 and MFN-1 levels in mice treated as indicated., mean±S.E. n=6 mice

**Supplementary Figure 2**
